# Supplementary material
Source: Springer Nature journal article supplement (https://www.springermedizin.de/resource/supplementary/12990_2009_259_MOESM2_ESM.pdf/9612904)

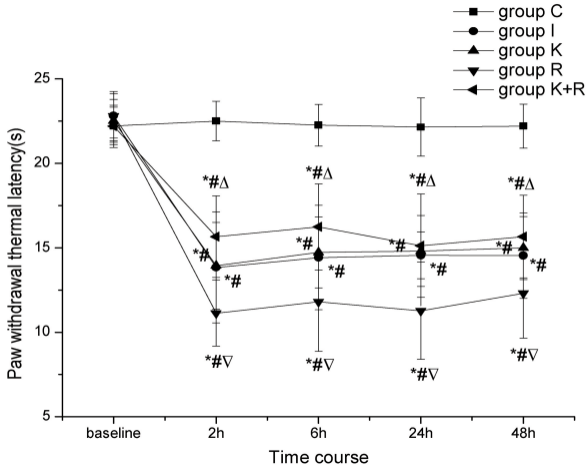

Supplement: MOESM2 [file 9612904]
